# Supplementary material
Source: PubMed Central journal article supplement (PMC9094430)
Supplement: NIHMS1789350-supplement-Stark_JINS_SupplementaryMaterial.pdf [file NIHMS1789350-supplement-Stark_JINS_SupplementaryMaterial.pdf]

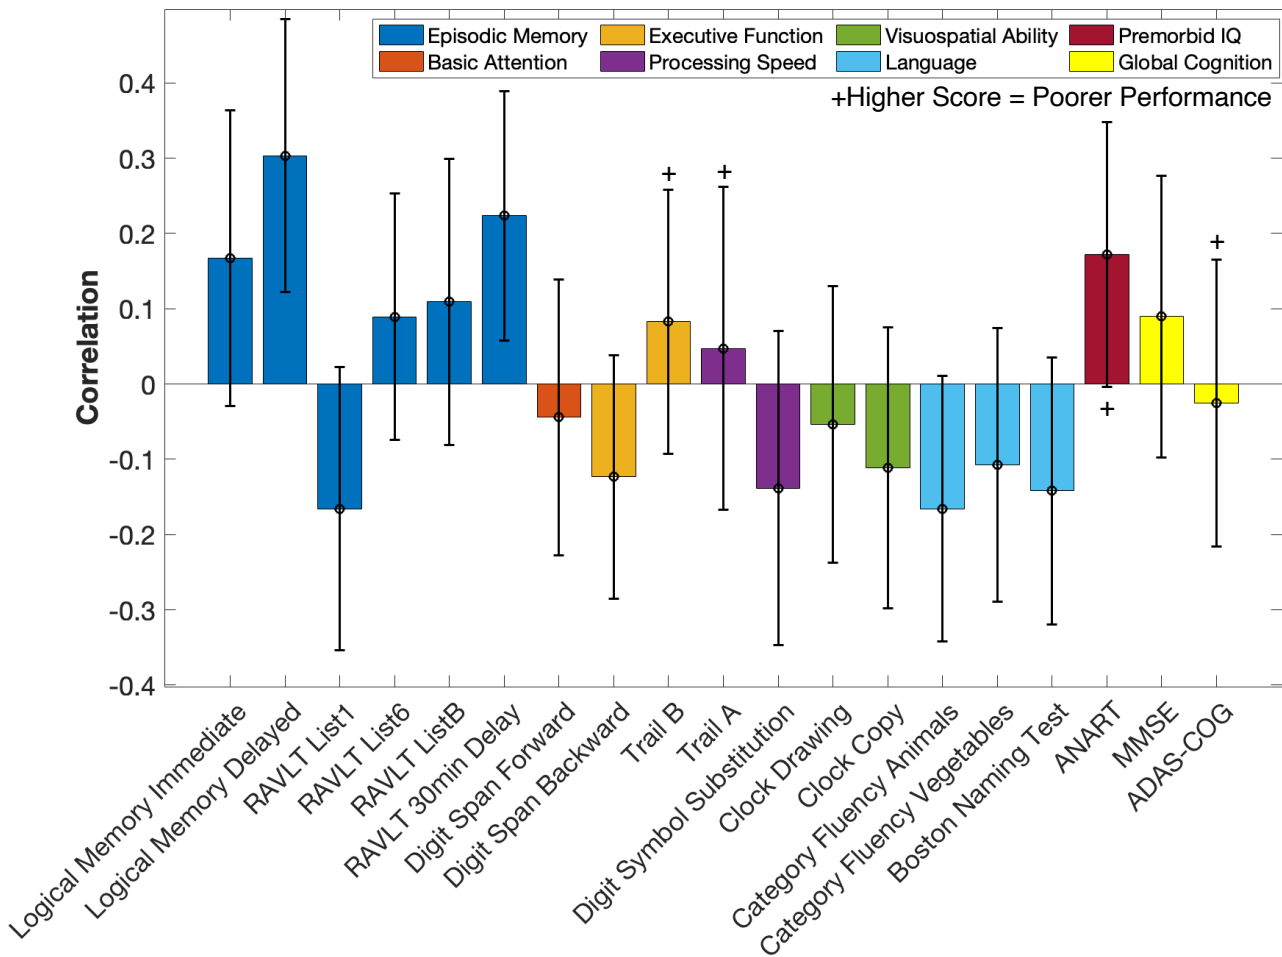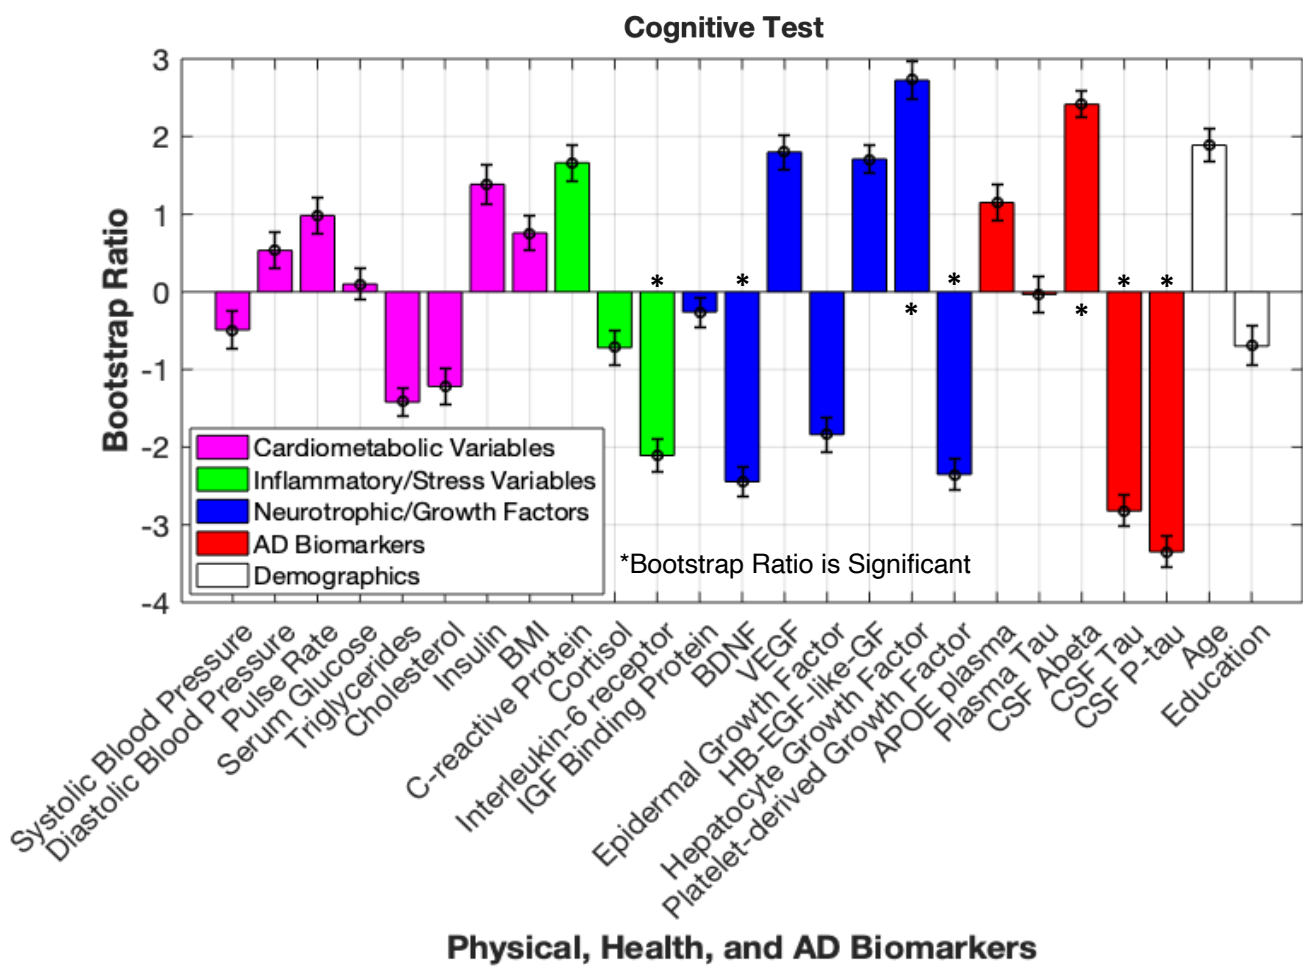

**Supplemental Figure 1. Correlation profile and bootstrap ratios for Latent Variable 2.** **A.** The correlation between each cognitive test variable to the identified physical, health, and AD variables listed in panel B. Significant variables have 95% confidence intervals (error bars) that do not cross the x-axis (0). **B.** Each Physical, Health, and AD Variable's contribution to LV2 represented by their bootstrap ratios, indicating directionality with significant cognitive tests represented in A (for instance, performance on logical memory delayed was positively correlated with CSF  $A\beta_{1-42}$ , and had a negative correlation with CSF tau). Error bars represent 95% confidence intervals. Variables with bootstrap ratios  $> |1.96|$  (equivalent to a p-value of  $< 0.05$ ) are considered significant contributors to the LV and are indicated by \*. (**KEY PANEL A:** ADAS-COG = Alzheimer's Disease Assessment Scale, Cognitive Subsection; ANART = American National Adult Reading Test; MMSE = Mini Mental State Examination; RAVLT = Rey Auditory Verbal Learning Test; **KEY PANEL B:** APOE = apolipoprotein E; BDNF = brain-derived neurotrophic factor; BMI = body mass index; CSF = cerebrospinal fluid; HB-EGF-like-GF = heparin-binding epidermal growth factor-like growth factor; IGF = insulin-like growth factor; P-tau = phospho-tau 181; VEGF = vascular endothelial growth factor).

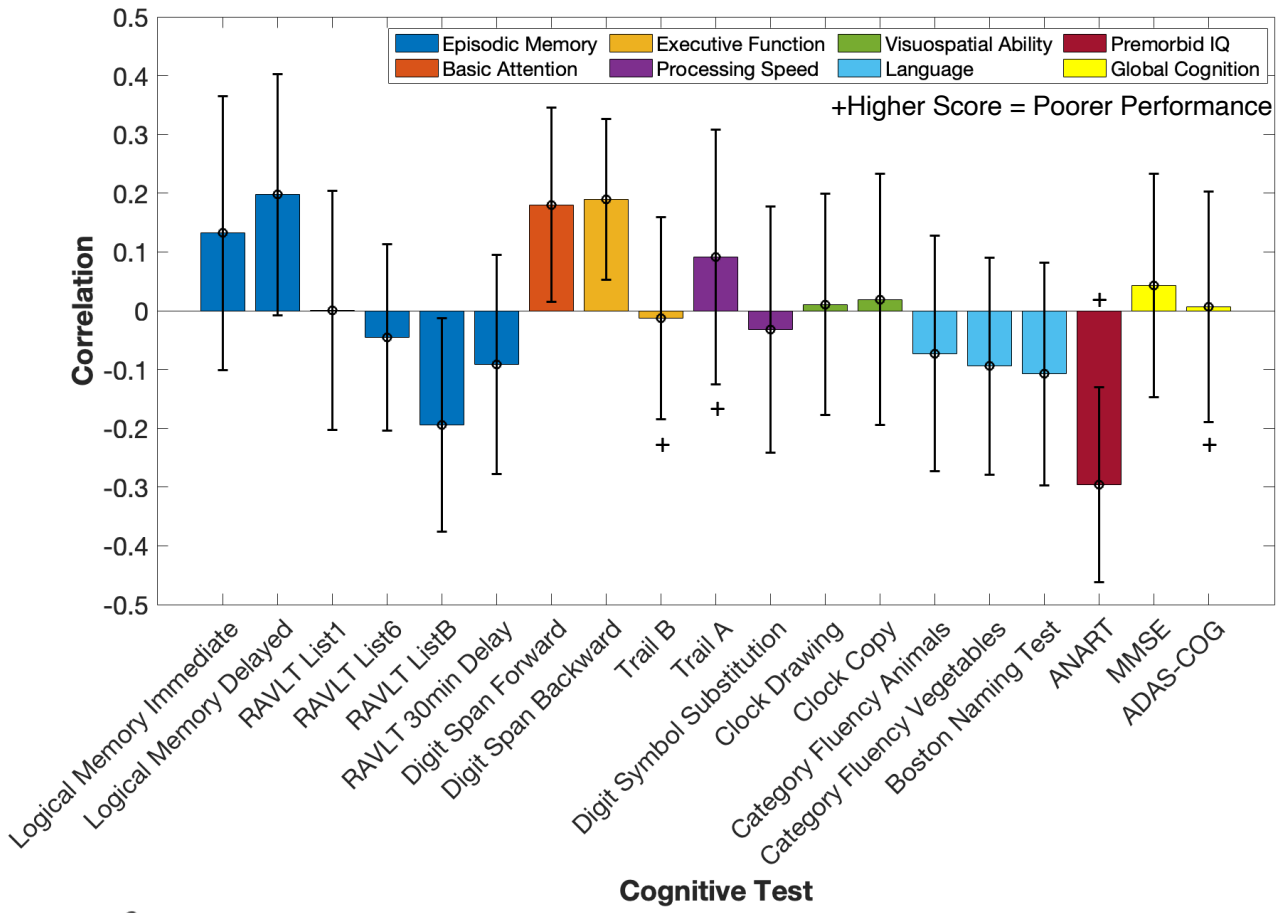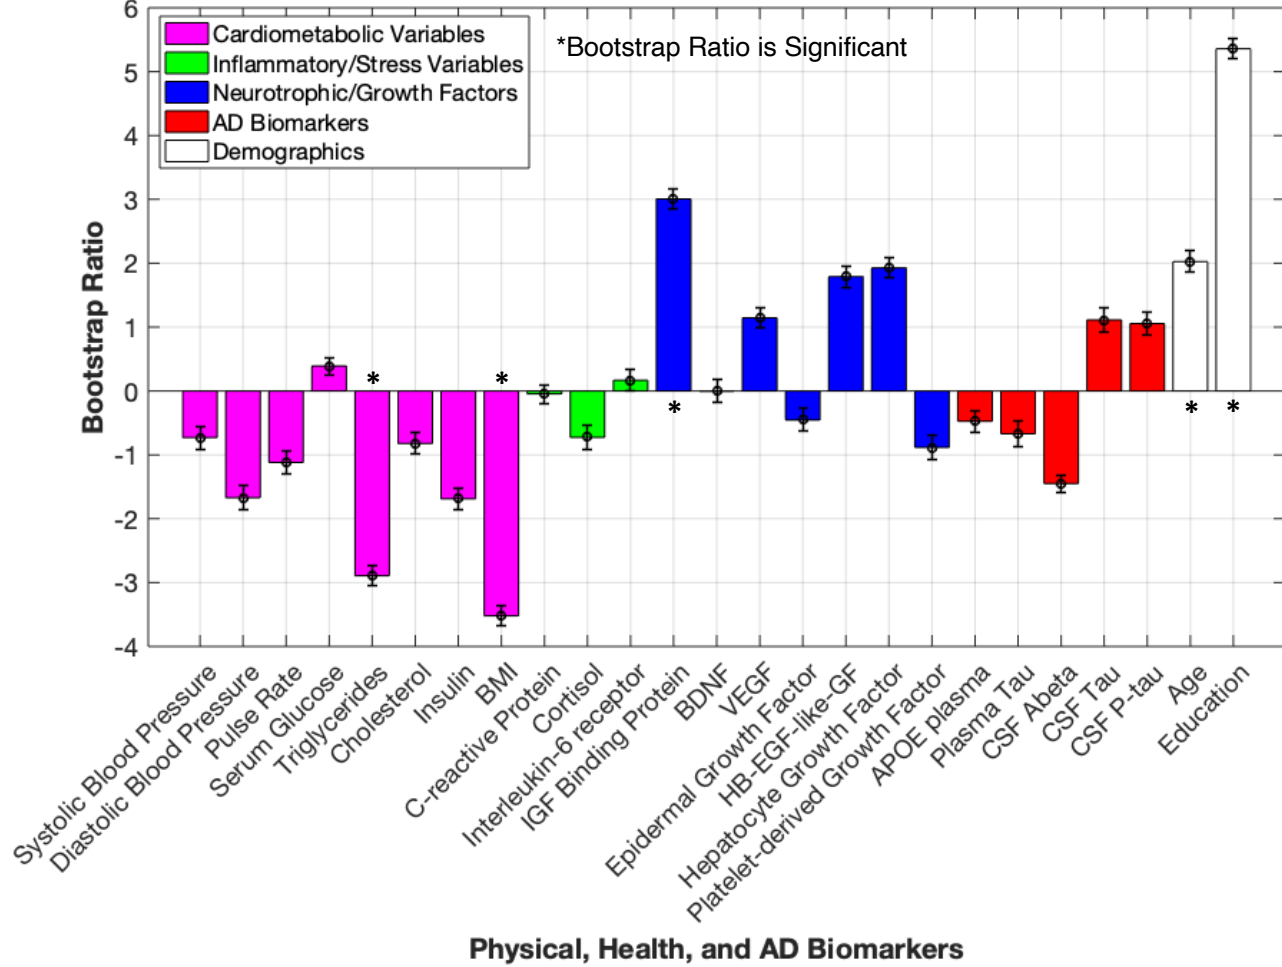

**Supplemental Figure 2. Correlation profile and bootstrap ratios for Latent Variable 3.** **A.** The correlation between each cognitive test variable to the identified physical, health, and AD variables listed in panel B. Significant variables have 95% confidence intervals (error bars) that do not cross the x-axis (0). **B.** Each Physical, Health, and AD Variable's contribution to LV3 represented by their bootstrap ratios, indicating directionality with significant cognitive tests represented in A (for instance, performance on digit span backward was positively correlated with education, and had a negative correlation with BMI). Error bars represent 95% confidence intervals. Variables with bootstrap ratios  $> |1.96|$  (equivalent to a p-value of  $< 0.05$ ) are considered significant contributors to the LV and are indicated by \*. (**KEY PANEL A:** ADAS-COG = Alzheimer's disease Assessment Scale, Cognitive Subsection; ANART = American National Adult Reading Test; MMSE = Mini Mental State Examination; RAVLT = Rey Auditory Verbal Learning Test; **KEY PANEL B:** APOE = apolipoprotein E; BDNF = brain-derived neurotrophic factor; BMI = body mass index; CSF = cerebrospinal fluid; HB-EGF-like-GF = heparin-binding epidermal growth factor-like growth factor; IGF = insulin-like growth factor; P-tau = phospho-tau 181; VEGF = vascular endothelial growth factor).
